# Supplementary material
Source: Springer Nature journal article supplement (https://www.springermedizin.de/resource/supplementary/13054_2012_1868_MOESM5_ESM.pdf/9711672)

Survival  
rate %

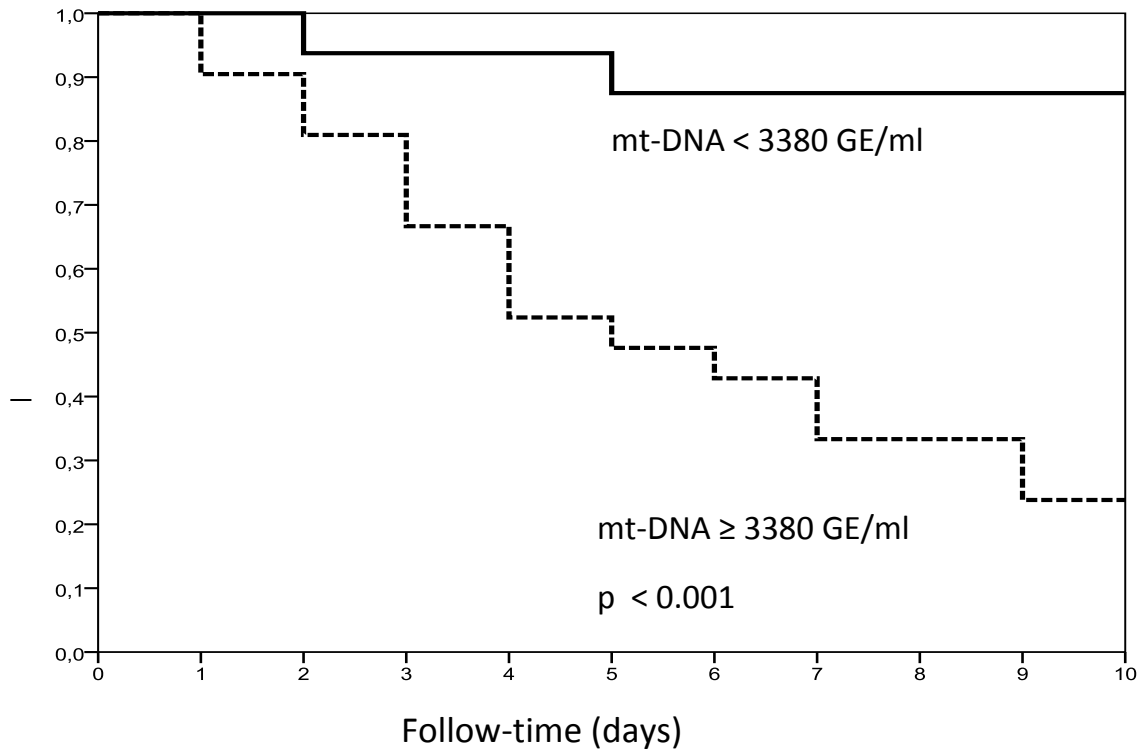

A

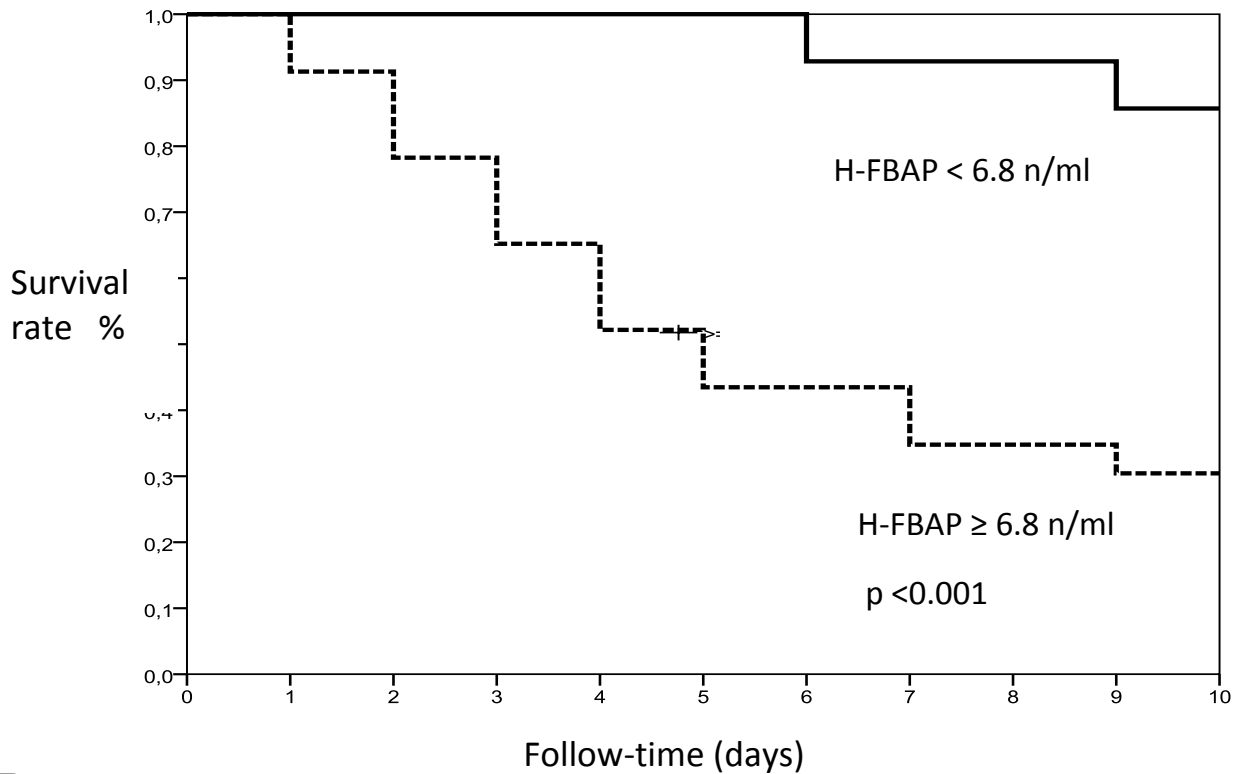

B

Survival  
rate %

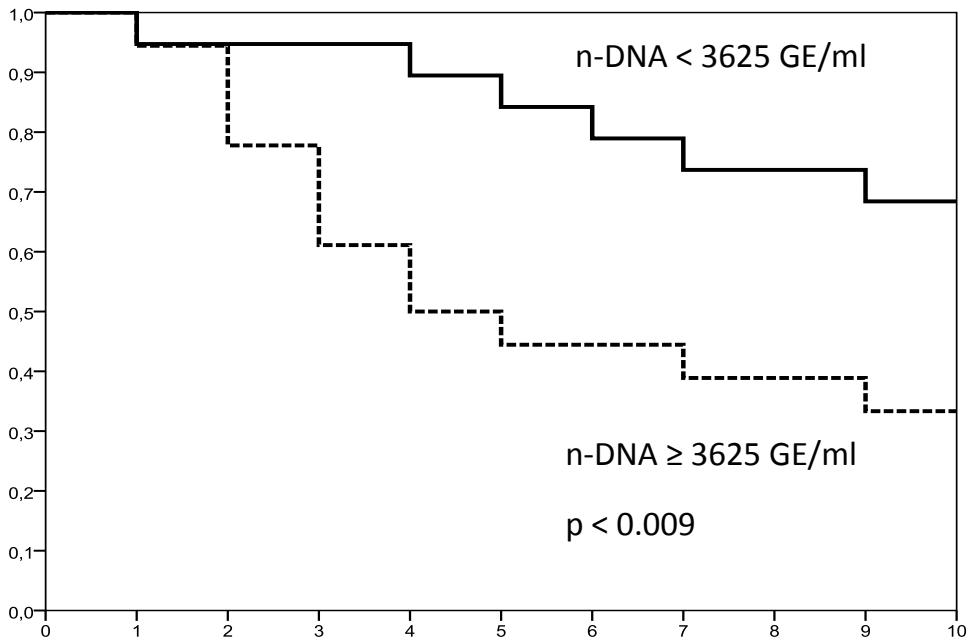

C

Follow-time (days)

Supplement: MOESM5 [file 9711672]
